# Supplementary material
Source: ML conference proceedings conference paper supplement (https://aclanthology.org/W19-5208)

Best system vs. relative difference

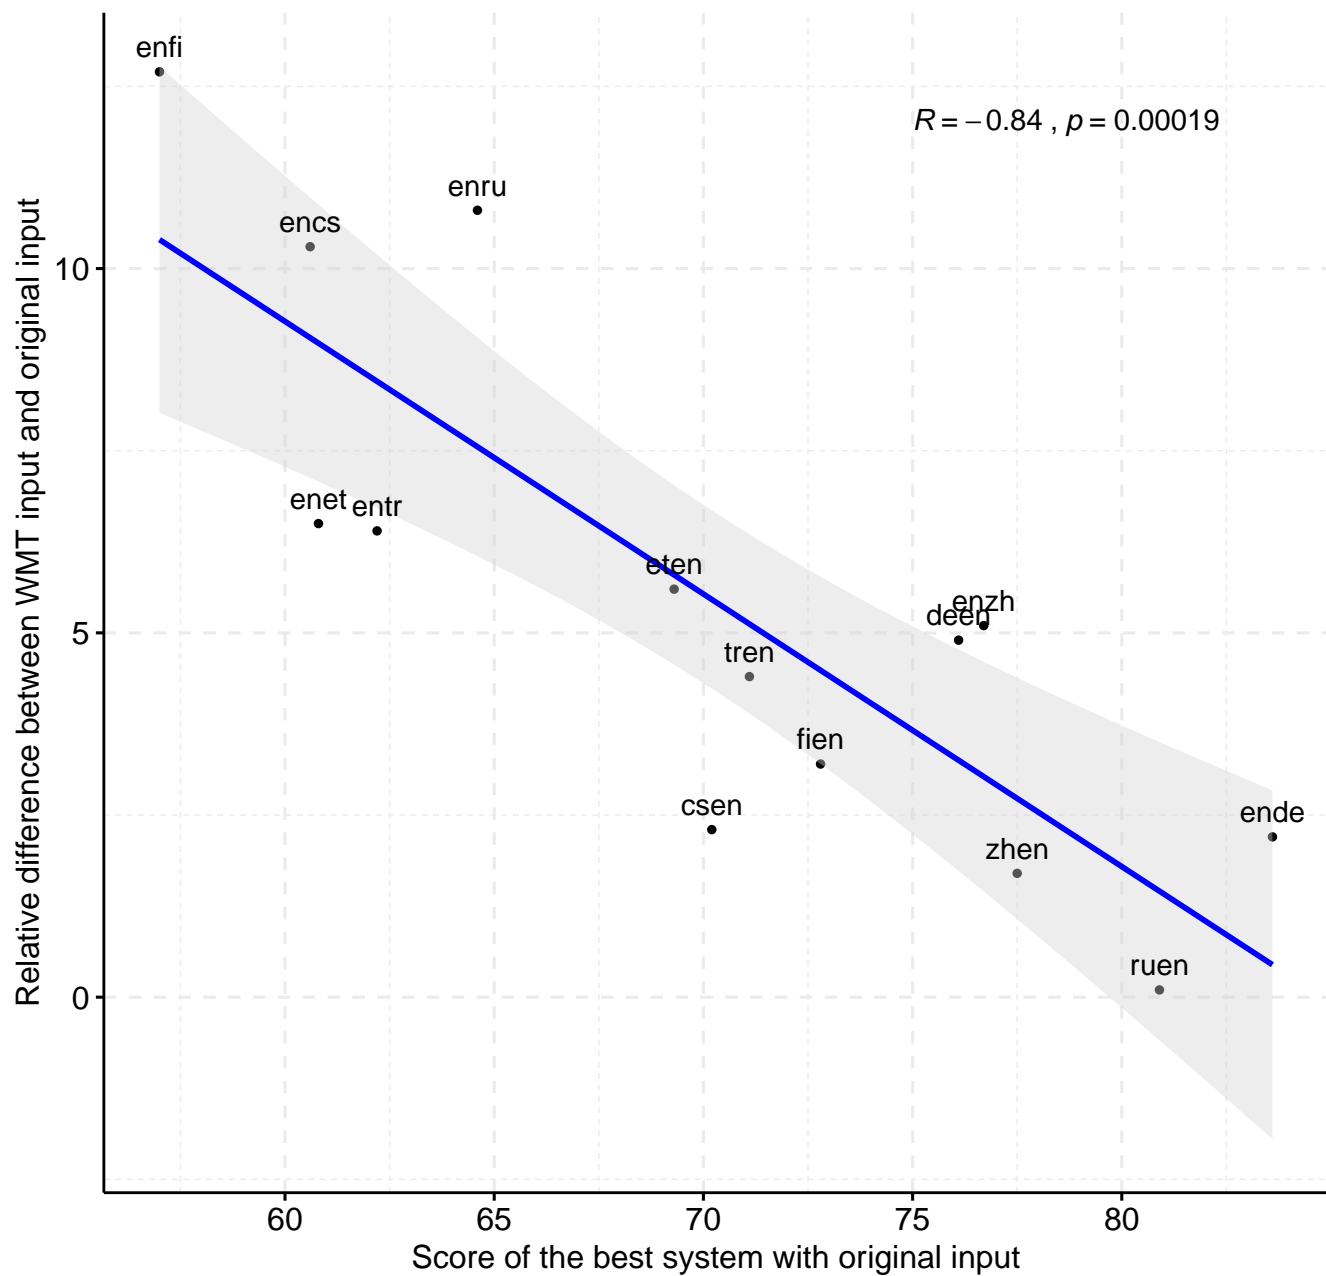

Best system vs. absolute difference

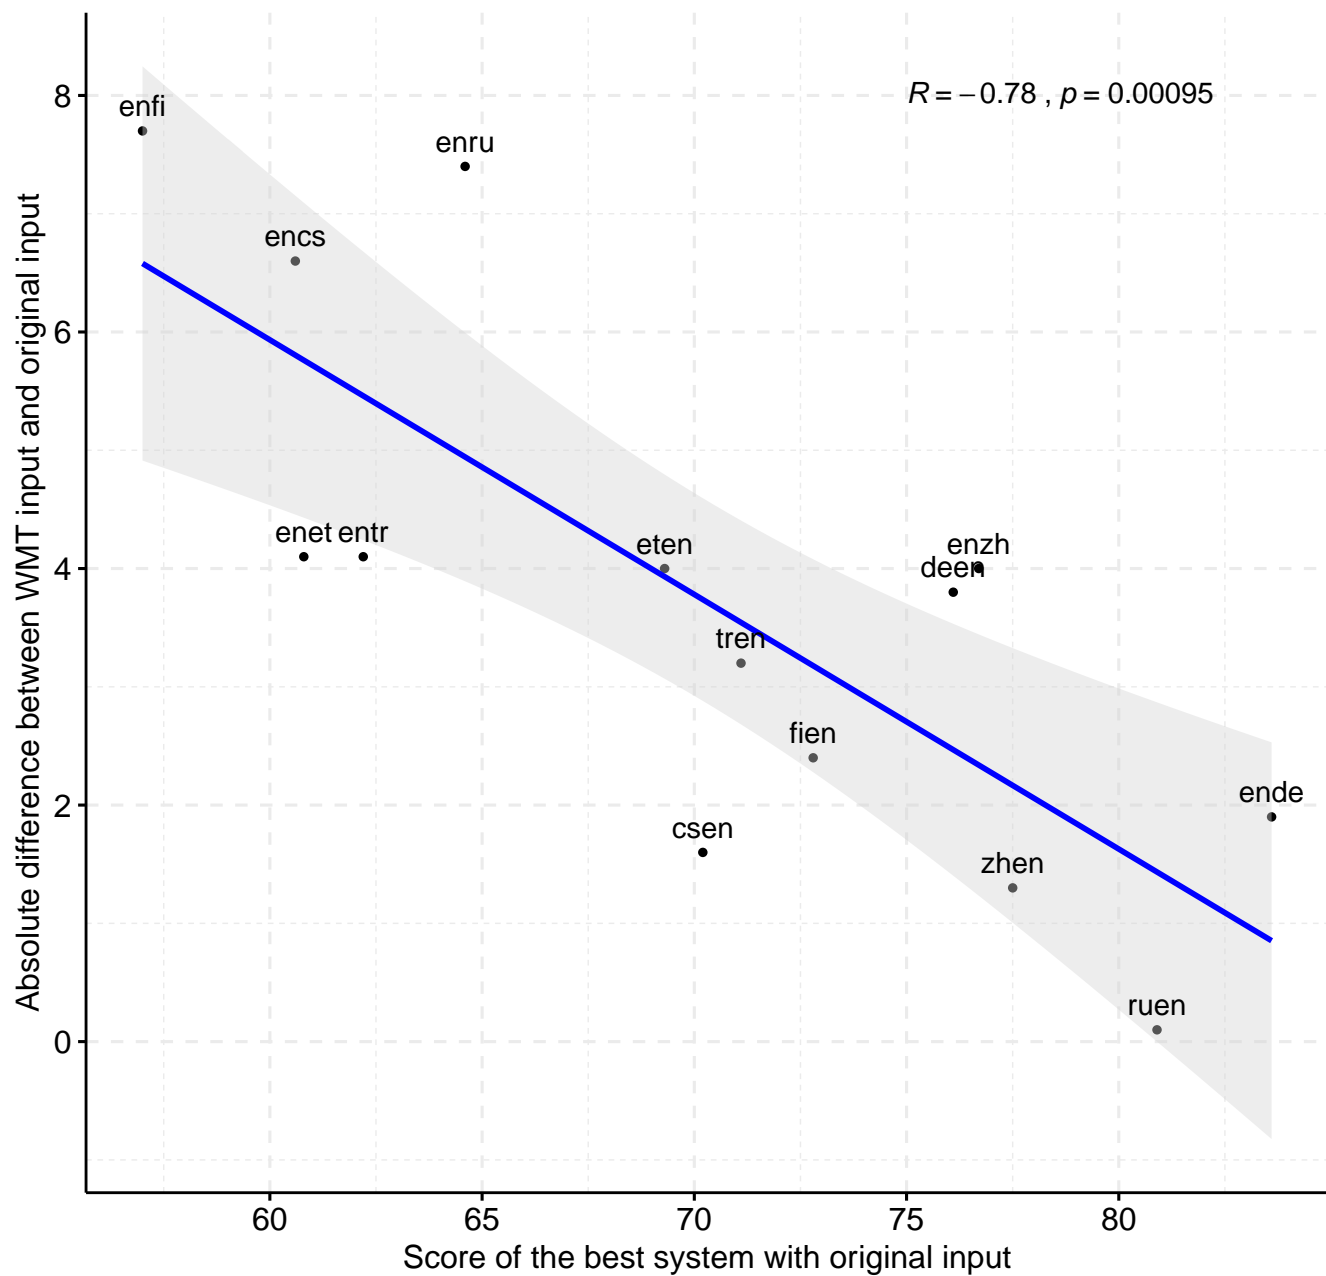

LS vs. relative difference

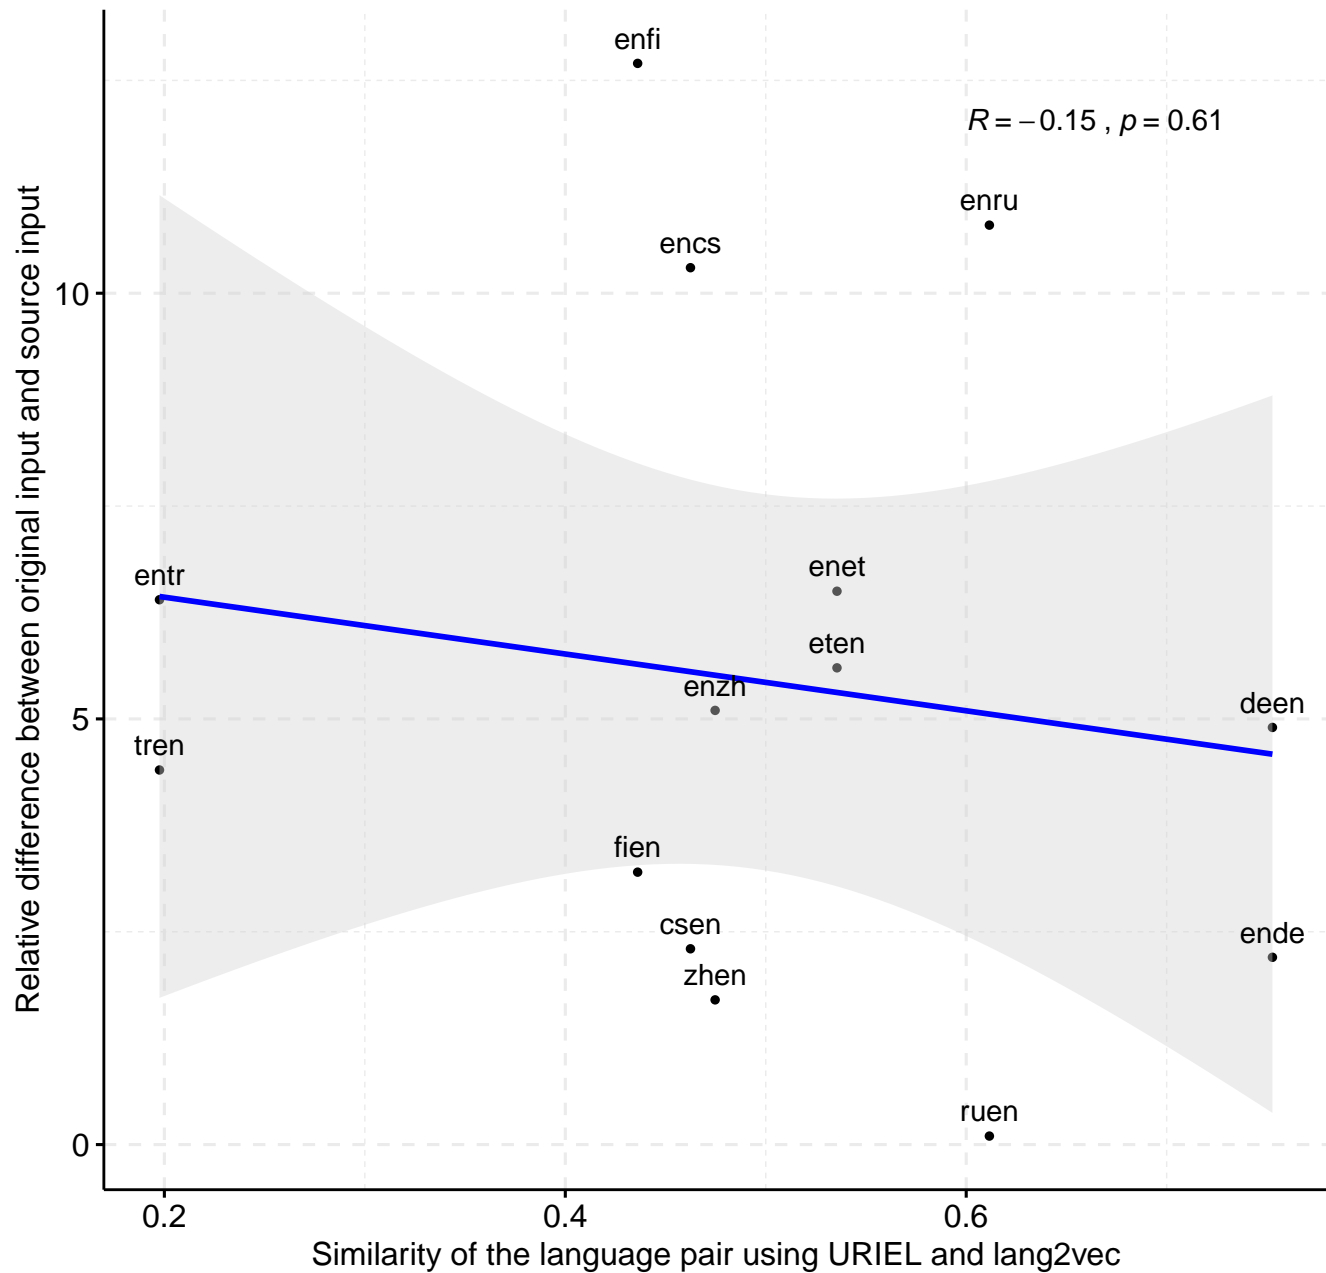

LS vs. absolute difference

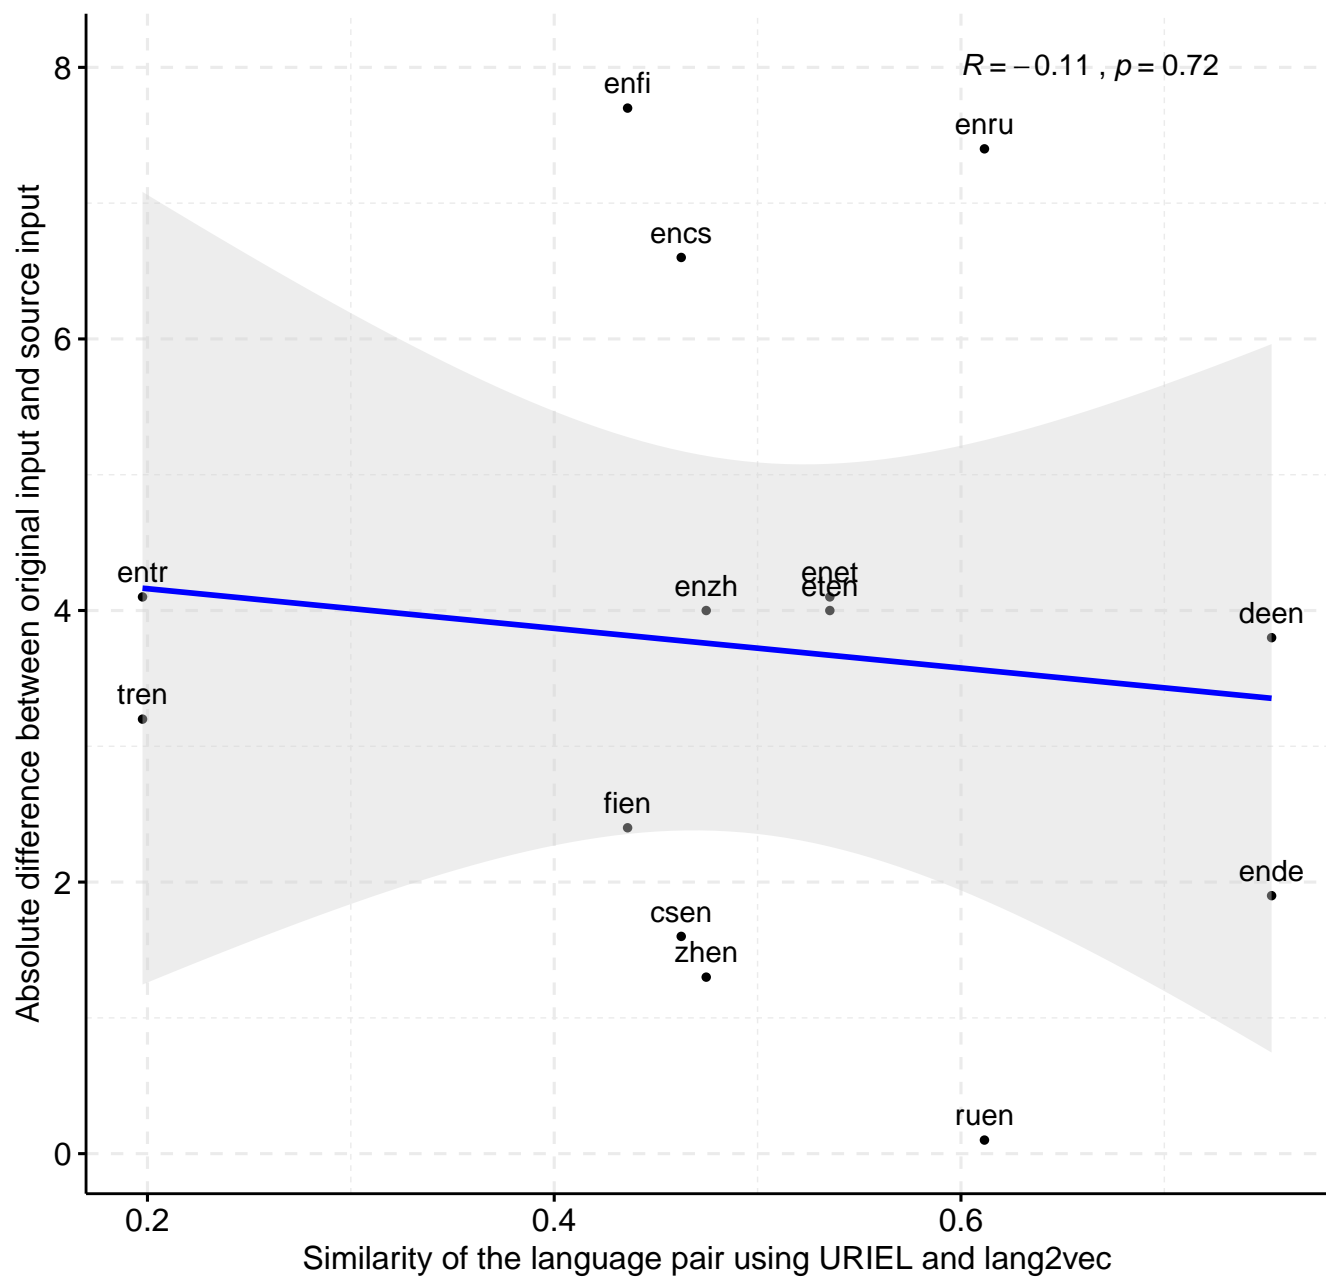

Supplement: Supplementary [file Rplots.pdf › Rplots.pdf]
