# Supplementary material
Source: ML conference proceedings conference paper supplement (https://aclanthology.org/W19-5208)
Supplement: Supplementary [file WMT_paper_supplementary.pdf › WMT_paper_supplementary.pdf]

# **The Effect of Translationese in Machine Translation Test Sets Supplementary Material**

**Mike Zhang**

Information Science Programme  
University of Groningen  
The Netherlands  
`j.j.zhang.1@student.rug.nl`

**Antonio Toral**

Center for Language and Cognition  
University of Groningen  
The Netherlands  
`a.toral.ruiz@rug.nl`

## **A Supplemental Material**

These are the supplementary tables for the paper “The Effect of Translationese in Machine Translation Test Sets”. Provided are the remaining 16 tables of each language direction. These tables are of the same structure as Table 4 in the paper.

| English→Chinese |    |                    |         |        |    |                |                    |         |        |    |                |                    |         |        |
|-----------------|----|--------------------|---------|--------|----|----------------|--------------------|---------|--------|----|----------------|--------------------|---------|--------|
|                 | #  | SYSTEM             | RAW.WMT | Z.WMT  | #  | ↑↓             | SYSTEM             | RAW.ORG | Z.ORG  | #  | ↑↓             | SYSTEM             | RAW.TRS | Z.TRS  |
| wmt17           | 1  | SogouKnowing-nmt   | 73.2    | 0.208  | 1  | —              | SogouKnowing-nmt   | 69.1    | 0.063  | 1  | 2 <sup>↑</sup> | xmunmt             | 78.2    | 0.396  |
|                 |    | uedin-nmt          | 72.5    | 0.178  |    | —              | uedin-nmt          | 67.8    | 0.015  |    | 1 <sup>↓</sup> | SogouKnowing-nmt   | 77.3    | 0.352  |
|                 |    | xmunmt             | 72.0    | 0.165  |    | —              | xmunmt             | 66.0    | -0.059 |    | 1 <sup>↓</sup> | uedin-nmt          | 77.4    | 0.349  |
|                 | 4  | online-B           | 69.8    | 0.065  |    | 2 <sup>↑</sup> | CASICT-cons        | 63.6    | -0.134 |    | 1 <sup>↑</sup> | jhu-nmt            | 75.4    | 0.278  |
|                 |    | jhu-nmt            | 69.5    | 0.056  |    | 1 <sup>↓</sup> | online-B           | 64.7    | -0.142 |    | 1 <sup>↓</sup> | online-B           | 74.8    | 0.271  |
|                 |    | CASICT-cons        | 68.5    | 0.035  |    | 1 <sup>↓</sup> | jhu-nmt            | 63.3    | -0.177 |    | 1 <sup>↑</sup> | online-A           | 74.0    | 0.223  |
|                 |    | online-A           | 68.2    | 0.010  |    | —              | online-A           | 62.5    | -0.195 |    | 1 <sup>↓</sup> | CASICT-cons        | 73.3    | 0.202  |
|                 | 8  | Oregon-State-Uni-S | 64.8    | -0.111 | 8  | —              | Oregon-State-Uni-S | 59.1    | -0.338 | 8  | —              | Oregon-State-Uni-S | 70.7    | 0.121  |
|                 | 9  | UU-HNMT            | 59.2    | -0.300 | 9  | —              | UU-HNMT            | 54.4    | -0.499 | 9  | —              | UU-HNMT            | 64.5    | -0.083 |
|                 | 10 | online-G           | 55.9    | -0.438 | 10 | —              | online-G           | 52.4    | -0.599 | 10 | —              | online-G           | 59.4    | -0.277 |
|                 | 11 | online-F           | 53.1    | -0.504 |    | —              | online-F           | 48.4    | -0.668 |    | —              | online-F           | 57.7    | -0.343 |
| wmt18           | 1  | Tencent-ensemble   | 80.7    | 0.219  | 1  | —              | Tencent-ensemble   | 76.7    | 0.062  | 1  | —              | Tencent-ensemble   | 83.0    | 0.314  |
|                 |    | Unisound           | 80.3    | 0.206  |    | —              | Unisound           | 76.1    | 0.046  |    | —              | Unisound           | 82.9    | 0.301  |
|                 |    | GTCOM-Primary      | 80.5    | 0.199  |    | 2 <sup>↑</sup> | Alibaba-General-A  | 74.9    | 0.040  |    | —              | GTCOM-Primary      | 83.2    | 0.301  |
|                 |    | Alibaba-ensemble   | 79.7    | 0.185  |    | 3 <sup>↑</sup> | Alibaba-General-B  | 74.6    | 0.024  |    | —              | Alibaba-ensemble   | 82.0    | 0.281  |
|                 |    | Alibaba-General-A  | 79.2    | 0.173  |    | 2 <sup>↓</sup> | GTCOM-Primary      | 75.9    | 0.021  |    | 1 <sup>↑</sup> | online-B           | 81.9    | 0.261  |
|                 |    | online-B           | 79.5    | 0.166  |    | 2 <sup>↓</sup> | Alibaba-ensemble   | 75.7    | 0.021  |    | 1 <sup>↓</sup> | Alibaba-General-A  | 81.7    | 0.252  |
|                 |    | Alibaba-General-B  | 79.0    | 0.165  |    | 1 <sup>↓</sup> | online-B           | 75.6    | 0.011  |    | —              | Alibaba-General-B  | 81.6    | 0.249  |
|                 | 8  | UMD                | 78.1    | 0.094  |    | 1 <sup>↑</sup> | NICT               | 74.2    | -0.050 | 8  | —              | UMD                | 81.3    | 0.209  |
|                 |    | NICT               | 77.5    | 0.082  |    | 1 <sup>↓</sup> | UMD                | 72.8    | -0.101 |    | 1 <sup>↑</sup> | online-Y           | 79.8    | 0.180  |
|                 |    | online-Y           | 77.1    | 0.069  |    | —              | online-Y           | 72.7    | -0.109 |    | 1 <sup>↑</sup> | online-A           | 79.2    | 0.179  |
|                 |    | online-A           | 75.5    | 0.037  | 11 | —              | online-A           | 69.3    | -0.207 |    | 2 <sup>↓</sup> | NICT               | 79.6    | 0.161  |
|                 | 12 | uedin              | 70.7    | -0.202 | 12 | —              | uedin              | 65.5    | -0.473 | 12 | —              | uedin              | 73.9    | -0.037 |
|                 | 13 | online-F           | 63.3    | -0.419 | 13 | —              | online-F           | 58.7    | -0.607 | 13 | 1 <sup>↑</sup> | online-G           | 65.6    | -0.307 |
|                 |    | online-G           | 63.4    | -0.435 |    | —              | online-G           | 59.7    | -0.647 |    | 1 <sup>↓</sup> | online-F           | 66.0    | -0.309 |

Table 1: Results of the English→Chinese language direction with WMT, ORG, and TRS. Systems are ordered by standardized mean DA score. If a system does not contain a rank, it indicates that it shares the same cluster as the system above it. Clusters are obtained according to Wilcoxon rank-sum test at p-level  $p \leq 0.05$ . Indicated in the [↑↓] column are the changes in absolute ranking (i.e. how many positions it goes up or down).

Czech→English

|       | # | SYSTEM           | RAW.WMT | Z.WMT  | # | ↑↓ | SYSTEM           | RAW.ORG | Z.ORG  | #  | ↑↓ | SYSTEM           | RAW.TRS | Z.TRS  |
|-------|---|------------------|---------|--------|---|----|------------------|---------|--------|----|----|------------------|---------|--------|
| wmt16 | 1 | uedin-nmt        | 75.4    | 0.207  | 1 | —  | uedin-nmt        | 69.6    | -0.010 | 1  | —  | uedin-nmt        | 81.1    | 0.421  |
|       | 2 | jhu-pbmt         | 72.6    | 0.101  | 2 | —  | jhu-pbmt         | 67.7    | -0.073 | 2  | —  | jhu-pbmt         | 77.5    | 0.275  |
|       | 3 | online-B         | 70.8    | 0.051  | 3 | —  | online-B         | 66.1    | -0.124 | —  | —  | online-B         | 75.5    | 0.224  |
|       | 4 | online-A         | 69.5    | 0.000  | — | —  | online-A         | 64.8    | -0.169 | 4  | 1↑ | PJATK            | 75.3    | 0.197  |
|       |   | PJATK            | 69.0    | -0.024 | 5 | —  | PJATK            | 62.7    | -0.245 | 1↓ | —  | online-A         | 74.0    | 0.165  |
|       | 6 | cu-mergedtrees   | 55.8    | -0.503 | 6 | —  | cu-mergedtrees   | 53.2    | -0.599 | 6  | —  | cu-mergedtrees   | 58.4    | -0.406 |
| wmt17 | 1 | uedin-nmt        | 74.6    | 0.181  | 1 | —  | uedin-nmt        | 70.3    | 0.018  | 1  | —  | uedin-nmt        | 78.8    | 0.343  |
|       | 2 | online-B         | 71.9    | 0.068  | 2 | —  | online-B         | 68.8    | -0.049 | 2  | —  | online-B         | 74.9    | 0.185  |
|       | 3 | online-A         | 68.3    | -0.068 | 3 | —  | online-A         | 64.7    | -0.193 | 3  | —  | online-A         | 71.8    | 0.057  |
|       | 4 | PJATK            | 62.7    | -0.268 | 4 | —  | PJATK            | 57.5    | -0.462 | 4  | —  | PJATK            | 67.9    | -0.074 |
| wmt18 | 1 | CUNI-Transformer | 71.8    | 0.298  | 1 | —  | CUNI-Transformer | 70.2    | 0.254  | 1  | —  | CUNI-Transformer | 73.4    | 0.341  |
|       | 2 | uedin            | 67.9    | 0.165  | 2 | —  | uedin            | 65.9    | 0.104  | 2  | —  | uedin            | 70.0    | 0.225  |
|       | 3 | online-B         | 66.6    | 0.115  | — | —  | online-B         | 65.9    | 0.102  | 3  | —  | online-B         | 67.3    | 0.127  |
|       | 4 | online-A         | 62.1    | -0.023 | 4 | —  | online-A         | 60.9    | -0.051 | 4  | —  | online-A         | 63.2    | 0.004  |
|       | 5 | online-G         | 57.5    | -0.183 | 5 | —  | online-G         | 55.5    | -0.246 | 5  | —  | online-G         | 59.5    | -0.120 |

Table 2: Results of the Czech→English language direction with WMT, ORG, and TRS. Systems are ordered by standardized mean DA score. If a system does not contain a rank, it indicates that it shares the same cluster as the system above it. Clusters are obtained according to Wilcoxon rank-sum test at p-level  $p \leq 0.05$ . Indicated in the [↑↓] column are the changes in absolute ranking (i.e. how many positions it goes up or down).

English→Czech

|       | #  | SYSTEM              | RAW.WMT | Z.WMT  | #  | ↑↓ | SYSTEM              | RAW.ORG | Z.ORG  | #  | ↑↓ | SYSTEM              | RAW.TRS | Z.TRS  |
|-------|----|---------------------|---------|--------|----|----|---------------------|---------|--------|----|----|---------------------|---------|--------|
| wmt17 | 1  | uedin-nmt           | 62.0    | 0.308  | 1  | —  | uedin-nmt           | 56.2    | 0.126  | 1  | —  | uedin-nmt           | 69.4    | 0.544  |
|       | 2  | online-B            | 59.7    | 0.240  | —  | —  | online-B            | 55.1    | 0.090  | 2  | —  | online-B            | 64.8    | 0.405  |
|       | 3  | limsi-factored-norm | 55.9    | 0.111  | 3  | —  | limsi-factored-norm | 50.2    | -0.074 | —  | —  | limsi-factored-norm | 63.5    | 0.354  |
|       |    | LIUM-FNMT           | 55.2    | 0.102  | —  | —  | LIUM-FNMT           | 49.6    | -0.076 | 1↑ | —  | LIUM-FNMT           | 61.8    | 0.299  |
|       |    | LIUM-NMT            | 55.2    | 0.090  | —  | —  | LIUM-NMT            | 49.5    | -0.086 | 1↓ | —  | LIUM-FNMT           | 61.5    | 0.299  |
|       |    | CU-Chimera          | 54.1    | 0.050  | —  | —  | CU-Chimera          | 48.2    | -0.143 | 1↑ | —  | online-A            | 61.1    | 0.282  |
|       |    | online-A            | 53.3    | 0.029  | 7  | —  | online-A            | 45.2    | -0.233 | 1↓ | —  | CU-Chimera          | 61.1    | 0.278  |
|       | 8  | TT-ufal.8gb         | 44.9    | -0.236 | 8  | —  | TT-ufal.8gb         | 40.5    | -0.380 | 8  | —  | TT-ufal.8gb         | 49.9    | -0.075 |
|       | 9  | TT-afri.4gb         | 42.2    | -0.315 | 9  | 1↑ | PJATK               | 36.9    | -0.479 | —  | —  | TT-afri.4gb         | 48.0    | -0.147 |
|       |    | PJATK               | 41.9    | -0.327 | 1↓ | —  | TT-afri.4gb         | 36.2    | -0.491 | 1↑ | —  | TT-baseline.8gb     | 47.2    | -0.169 |
|       |    | TT-baseline.8gb     | 40.7    | -0.373 | 1↑ | —  | TT-afri.8gb         | 35.1    | -0.556 | 1↓ | —  | PJATK               | 46.9    | -0.174 |
|       |    | TT-afri.8gb         | 40.5    | -0.376 | 1↓ | —  | TT-baseline.8gb     | 34.5    | -0.565 | —  | —  | TT-afri.8gb         | 46.3    | -0.184 |
|       | 13 | TT-ufal.4gb         | 36.5    | -0.486 | 1↑ | —  | TT-denisov.4gb      | 33.1    | -0.598 | 13 | —  | TT-ufal.4gb         | 42.2    | -0.316 |
| wmt18 |    | TT-denisov.4gb      | 36.6    | -0.493 | 1↓ | —  | TT-ufal.4gb         | 31.0    | -0.647 | —  | —  | TT-denisov.4gb      | 40.2    | -0.386 |
|       | 1  | CUNI-Transformer    | 67.2    | 0.594  | 1  | —  | CUNI-Transformer    | 60.6    | 0.397  | 1  | —  | CUNI-Transformer    | 74.4    | 0.814  |
|       | 2  | uedin               | 60.6    | 0.384  | 2  | —  | uedin               | 52.4    | 0.120  | 2  | —  | uedin               | 69.6    | 0.674  |
|       | 3  | online-B            | 52.1    | 0.101  | 3  | —  | online-B            | 45.4    | -0.098 | 3  | —  | online-B            | 59.3    | 0.315  |
|       | 4  | online-A            | 46.0    | -0.115 | 4  | —  | online-A            | 36.6    | -0.405 | 4  | —  | online-A            | 56.2    | 0.202  |
|       | 5  | online-G            | 42.0    | -0.246 | —  | —  | online-G            | 34.9    | -0.467 | 5  | —  | online-G            | 49.7    | -0.004 |

Table 3: Results of the English→Czech language direction with WMT, ORG, and TRS. Systems are ordered by standardized mean DA score. If a system does not contain a rank, it indicates that it shares the same cluster as the system above it. Clusters are obtained according to Wilcoxon rank-sum test at p-level  $p \leq 0.05$ . Indicated in the [↑↓] column are the changes in absolute ranking (i.e. how many positions it goes up or down).

**Estonian→English**

| #  | SYSTEM           | RAW.WMT | Z.WMT  | #  | ↑↓ | SYSTEM           | RAW.ORG | Z.ORG  | #  | ↑↓ | SYSTEM           | RAW.TRS | Z.TRS  |
|----|------------------|---------|--------|----|----|------------------|---------|--------|----|----|------------------|---------|--------|
| 1  | tilde-nc-nmt     | 73.3    | 0.326  | 1  | —  | tilde-nc-nmt     | 69.3    | 0.208  | 1  | —  | tilde-nc-nmt     | 77.3    | 0.444  |
| 2  | NICT             | 71.1    | 0.238  | 2  | —  | NICT             | 66.2    | 0.108  | 2  | —  | NICT             | 75.8    | 0.366  |
|    | tilde-c-nmt      | 69.9    | 0.215  |    | —  | tilde-c-nmt      | 66.1    | 0.101  |    | —  | tilde-c-nmt      | 73.9    | 0.331  |
|    | M4t1ss           | 69.0    | 0.187  |    | 1↑ | uedin            | 65.6    | 0.060  |    | —  | M4t1ss           | 73.5    | 0.316  |
|    | uedin            | 69.2    | 0.186  |    | 1↓ | M4t1ss           | 64.4    | 0.058  |    | 1↑ | tilde-c-nmt-comb | 73.0    | 0.312  |
|    | tilde-c-nmt-comb | 68.7    | 0.171  |    | —  | tilde-c-nmt-comb | 64.3    | 0.031  |    | 1↓ | uedin            | 72.7    | 0.307  |
| 7  | online-B         | 67.1    | 0.117  |    | —  | online-B         | 64.7    | 0.030  | 7  | 1↑ | HY-NMT-et-en     | 70.7    | 0.227  |
|    | HY-NMT-et-en     | 66.4    | 0.106  |    | 1↑ | talp-upc         | 62.5    | -0.003 |    | 1↑ | talp-upc         | 71.0    | 0.214  |
|    | talp-upc         | 66.8    | 0.106  |    | 1↓ | HY-NMT-et-en     | 61.9    | -0.018 |    | 2↓ | online-B         | 69.6    | 0.206  |
| 10 | online-A         | 65.4    | 0.063  |    | —  | online-A         | 62.2    | -0.036 |    | —  | online-A         | 68.5    | 0.160  |
|    | CUNI-Kocmi       | 64.0    | 0.007  | 11 | —  | CUNI-Kocmi       | 59.3    | -0.137 | 11 | —  | CUNI-Kocmi       | 68.4    | 0.145  |
| 12 | neurotolge.ee    | 59.4    | -0.117 | 12 | —  | neurotolge.ee    | 54.4    | -0.260 | 12 | —  | neurotolge.ee    | 64.7    | 0.032  |
| 13 | online-G         | 52.7    | -0.341 | 13 | —  | online-G         | 52.9    | -0.342 | 13 | —  | online-G         | 52.6    | -0.340 |
| 14 | UnsupTartu       | 34.6    | -0.950 | 14 | —  | UnsupTartu       | 34.4    | -0.959 | 14 | —  | UnsupTartu       | 34.8    | -0.941 |

Table 4: Results of the Estonian→English language direction with WMT, ORG, and TRS. Systems are ordered by standardized mean DA score. If a system does not contain a rank, it indicates that it shares the same cluster as the system above it. Clusters are obtained according to Wilcoxon rank-sum test at p-level  $p \leq 0.05$ . Indicated in the [↑↓] column are the changes in absolute ranking (i.e. how many positions it goes up or down).

**English→Estonian**

| #  | SYSTEM        | RAW.WMT | Z.WMT  | #  | ↑↓ | SYSTEM        | RAW.ORG | Z.ORG  | #  | ↑↓ | SYSTEM        | RAW.TRS | Z.TRS  |
|----|---------------|---------|--------|----|----|---------------|---------|--------|----|----|---------------|---------|--------|
| 1  | tilde-nc-nmt  | 64.9    | 0.549  | 1  | —  | tilde-nc-nmt  | 60.8    | 0.416  | 1  | —  | tilde-nc-nmt  | 68.8    | 0.676  |
| 2  | NICT          | 62.1    | 0.453  |    | —  | NICT          | 59.2    | 0.346  | 2  | —  | NICT          | 64.9    | 0.558  |
|    | tilde-c-nmt   | 61.6    | 0.427  |    | —  | tilde-c-nmt   | 58.5    | 0.317  |    | 1↑ | M4t1ss        | 64.9    | 0.545  |
|    | M4t1ss        | 61.2    | 0.418  |    | —  | M4t1ss        | 57.5    | 0.289  |    | 1↓ | tilde-c-nmt   | 64.6    | 0.534  |
| 5  | Aalto         | 58.6    | 0.340  |    | —  | Aalto         | 55.1    | 0.213  |    | 1↑ | HY-NMT-en-et  | 62.7    | 0.464  |
|    | HY-NMT-en-et  | 58.6    | 0.329  |    | 1↑ | uedin         | 54.7    | 0.198  |    | 1↓ | Aalto         | 62.1    | 0.463  |
|    | uedin         | 57.5    | 0.295  |    | 1↓ | HY-NMT-en-et  | 54.5    | 0.190  |    | —  | uedin         | 60.2    | 0.390  |
| 8  | CUNI-Kocmi    | 55.5    | 0.216  |    | —  | CUNI-Kocmi    | 54.4    | 0.174  | 8  | 1↑ | talp-upc      | 57.9    | 0.292  |
|    | talp-upc      | 54.6    | 0.181  | 9  | —  | talp-upc      | 51.2    | 0.068  |    | 1↓ | CUNI-Kocmi    | 56.7    | 0.258  |
| 10 | online-B      | 52.1    | 0.097  |    | —  | online-B      | 49.1    | -0.010 |    | —  | online-B      | 55.1    | 0.201  |
| 11 | neurotolge.ee | 45.7    | -0.132 | 11 | —  | neurotolge.ee | 43.6    | -0.201 | 11 | 1↑ | online-A      | 48.4    | -0.047 |
| 12 | online-A      | 43.8    | -0.195 | 12 | —  | online-A      | 39.2    | -0.347 |    | 1↓ | neurotolge.ee | 47.8    | -0.064 |
| 13 | online-G      | 37.6    | -0.406 | 13 | —  | online-G      | 34.7    | -0.508 | 13 | —  | online-G      | 40.5    | -0.305 |
| 14 | parfda        | 34.3    | -0.520 | 14 | —  | parfda        | 31.8    | -0.604 | 14 | —  | parfda        | 36.7    | -0.437 |

Table 5: Results of the English→Estonian language direction with WMT, ORG, and TRS. Systems are ordered by standardized mean DA score. If a system does not contain a rank, it indicates that it shares the same cluster as the system above it. Clusters are obtained according to Wilcoxon rank-sum test at p-level  $p \leq 0.05$ . Indicated in the [↑↓] column are the changes in absolute ranking (i.e. how many positions it goes up or down).

Finnish→English

| #     | SYSTEM         | RAW.WMT | Z.WMT  | # | ↑↓ | SYSTEM       | RAW.ORG | Z.ORG  | # | ↑↓             | SYSTEM       | RAW.TRS | Z.TRS  |
|-------|----------------|---------|--------|---|----|--------------|---------|--------|---|----------------|--------------|---------|--------|
| wmt16 | 1 online-B     | 66.9    | 0.095  | 1 | —  | online-B     | 63.7    | -0.005 | 1 | 2 <sup>↑</sup> | online-G     | 69.9    | 0.220  |
|       | uedin-pbmt     | 66.3    | 0.087  |   | —  | uedin-pbmt   | 63.1    | -0.034 |   | —              | uedin-pbmt   | 69.6    | 0.210  |
|       | online-G       | 66.4    | 0.084  |   | —  | online-G     | 62.9    | -0.051 | 1 | ↑              | UH-opus      | 70.0    | 0.207  |
|       | UH-opus        | 65.9    | 0.065  |   | —  | UH-opus      | 61.8    | -0.078 | 3 | ↓              | online-B     | 70.1    | 0.195  |
|       | 5 PROMT-SMT    | 62.9    | -0.037 | 5 | —  | PROMT-SMT    | 60.3    | -0.136 | 5 | —              | PROMT-SMT    | 65.5    | 0.063  |
|       | 6 uedin-syntax | 61.5    | -0.090 |   | —  | uedin-syntax | 59.0    | -0.174 | 6 | —              | uedin-syntax | 64.0    | -0.007 |
|       | UH-factored    | 61.2    | -0.098 |   | —  | UH-factored  | 58.6    | -0.180 |   | —              | UH-factored  | 63.7    | -0.016 |
|       | online-A       | 60.6    | -0.126 |   | —  | online-A     | 58.1    | -0.208 |   | —              | online-A     | 63.2    | -0.044 |
|       | 9 jhu-pbmt     | 52.7    | -0.391 | 9 | —  | jhu-pbmt     | 51.8    | -0.425 | 9 | —              | jhu-pbmt     | 53.6    | -0.357 |
| wmt17 | 1 online-B     | 73.8    | 0.407  | 1 | —  | online-B     | 71.7    | 0.324  | 1 | —              | online-B     | 76.0    | 0.490  |
|       | 2 online-G     | 67.5    | 0.220  | 2 | —  | online-G     | 63.8    | 0.086  | 2 | —              | online-G     | 71.2    | 0.358  |
|       | 3 online-A     | 62.6    | 0.041  | 3 | —  | online-A     | 59.3    | -0.066 | 3 | —              | online-A     | 66.0    | 0.151  |
|       | 4 TALP-UPC     | 58.8    | -0.095 |   | —  | TALP-UPC     | 58.2    | -0.120 | 4 | —              | TALP-UPC     | 59.5    | -0.069 |
|       | 5 Hunter-MT    | 52.1    | -0.316 | 5 | —  | Hunter-MT    | 49.3    | -0.396 | 5 | —              | Hunter-MT    | 55.0    | -0.237 |
|       | 6 apertium     | 44.6    | -0.559 | 6 | —  | apertium     | 42.1    | -0.648 | 6 | —              | apertium     | 47.1    | -0.469 |
| wmt18 | 1 NICT         | 75.2    | 0.153  | 1 | —  | NICT         | 72.8    | 0.086  | 1 | —              | NICT         | 77.5    | 0.218  |
|       | HY-NMT-fi-en   | 74.4    | 0.128  |   | —  | HY-NMT-fi-en | 72.2    | 0.044  |   | —              | HY-NMT-fi-en | 76.7    | 0.216  |
|       | uedin          | 74.0    | 0.103  | 3 | ↑  | talp-upc     | 71.7    | 0.028  |   | —              | uedin        | 77.4    | 0.200  |
|       | CUNI-Kocmi     | 72.7    | 0.083  | 3 | ↑  | online-A     | 71.2    | 0.027  |   | —              | CUNI-Kocmi   | 76.2    | 0.187  |
|       | online-B       | 72.9    | 0.078  |   | —  | online-B     | 71.2    | 0.020  |   | —              | online-B     | 74.5    | 0.136  |
|       | talp-upc       | 71.9    | 0.047  | 3 | ↓  | uedin        | 70.7    | 0.008  | 6 | —              | talp-upc     | 72.1    | 0.066  |
|       | online-A       | 71.5    | 0.045  | 3 | ↓  | CUNI-Kocmi   | 69.2    | -0.024 |   | —              | online-A     | 71.9    | 0.064  |
|       | 8 online-G     | 66.1    | -0.134 | 8 | —  | online-G     | 63.0    | -0.250 | 8 | —              | online-G     | 69.2    | -0.019 |
|       | 9 JUCBNMT      | 58.9    | -0.404 | 9 | —  | JUCBNMT      | 57.3    | -0.480 | 9 | —              | JUCBNMT      | 60.6    | -0.325 |

Table 6: Results of the Finnish→English language direction with WMT, ORG, and TRS. Systems are ordered by standardized mean DA score. If a system does not contain a rank, it indicates that it shares the same cluster as the system above it. Clusters are obtained according to Wilcoxon rank-sum test at p-level  $p \leq 0.05$ . Indicated in the [↑↓] column are the changes in absolute ranking (i.e. how many positions it goes up or down).

English→Finnish

| #     | SYSTEM             | RAW.WMT | Z.WMT  | #  | ↑↓            | SYSTEM           | RAW.ORG | Z.ORG  | #  | ↑↓               | SYSTEM          | RAW.TRS | Z.TRS  |
|-------|--------------------|---------|--------|----|---------------|------------------|---------|--------|----|------------------|-----------------|---------|--------|
| wmt17 | 1 online-B         | 59.6    | 0.378  | 1  | —             | online-B         | 54.5    | 0.209  | 1  | —                | online-B        | 65.2    | 0.561  |
|       | HY-HNMT            | 57.8    | 0.305  | 2  | —             | HY-HNMT          | 51.7    | 0.096  |    | —                | HY-HNMT         | 64.4    | 0.534  |
|       | 3 online-G         | 51.6    | 0.090  | 3  | —             | online-G         | 48.5    | -0.026 | 3  | 2↑               | AaltoHnmtMulti  | 55.8    | 0.236  |
|       | jhu-nmt-lattice    | 51.3    | 0.060  | 4  | —             | jhu-nmt-lattice  | 46.4    | -0.108 |    | —                | jhu-nmt-lattice | 56.0    | 0.220  |
|       | AaltoHnmtMulti     | 49.3    | -0.004 |    | —             | AaltoHnmtMulti   | 43.8    | -0.208 |    | 2↓               | online-G        | 54.6    | 0.201  |
|       | 6 AaltoHnmtFlatcat | 46.4    | -0.102 |    | —             | AaltoHnmtFlatcat | 42.7    | -0.245 | 6  | 2↑               | HY-SMT          | 51.3    | 0.085  |
|       | online-A           | 46.7    | -0.109 |    | —             | online-A         | 42.6    | -0.252 |    | —                | online-A        | 51.0    | 0.041  |
|       | HY-SMT             | 45.8    | -0.115 | 1↑ | HY-AH         | 40.6             | -0.290  |        | 2↓ | AaltoHnmtFlatcat | 49.8            | 0.031   |        |
|       | HY-AH              | 43.5    | -0.192 | 1↓ | HY-SMT        | 40.4             | -0.310  |        | 1↑ | jhu-pbmt         | 46.8            | -0.078  |        |
|       | jhu-pbmt           | 43.4    | -0.204 |    | —             | jhu-pbmt         | 40.5    | -0.312 |    | 1↓               | HY-AH           | 47.0    | -0.078 |
|       | 11 TALP-UPC        | 40.8    | -0.298 | 11 | —             | TALP-UPC         | 37.5    | -0.413 | 11 | —                | TALP-UPC        | 44.1    | -0.183 |
|       | 12 apertium        | 8.0     | -1.428 | 12 | —             | apertium         | 11.8    | -1.293 | 12 | —                | apertium        | 4.4     | -1.554 |
| wmt18 | 1 NICT             | 64.7    | 0.521  | 1  | —             | NICT             | 57.0    | 0.251  | 1  | —                | NICT            | 72.7    | 0.800  |
|       | HY-NMT-en-fi       | 63.1    | 0.466  |    | —             | HY-NMT-en-fi     | 56.5    | 0.232  |    | —                | HY-NMT-en-fi    | 69.6    | 0.696  |
|       | 3 uedin            | 59.2    | 0.324  | 3  | 1↑            | Aalto            | 52.8    | 0.073  |    | —                | uedin           | 67.5    | 0.636  |
|       | Aalto              | 58.3    | 0.271  | 1↑ | HY-NMTtwostep | 52.3             | 0.045   | 4      | 1↑ | HY-NMTtwostep    | 64.0            | 0.492   |        |
|       | HY-NMTtwostep      | 57.9    | 0.258  | 1↑ | talp-upc      | 52.4             | 0.044   |        | 1↓ | Aalto            | 64.0            | 0.477   |        |
|       | talp-upc           | 57.4    | 0.238  | 3↓ | uedin         | 51.6             | 0.033   |        | —  | talp-upc         | 62.3            | 0.430   |        |
|       | CUNI-Kocmi         | 55.9    | 0.184  |    | —             | CUNI-Kocmi       | 51.5    | 0.016  |    | 1↑               | online-B        | 63.0    | 0.421  |
|       | online-B           | 56.6    | 0.183  |    | —             | online-B         | 51.0    | -0.027 |    | 1↓               | CUNI-Kocmi      | 60.8    | 0.368  |
|       | 9 online-A         | 45.9    | -0.212 | 9  | 1↑            | online-G         | 41.2    | -0.375 | 9  | —                | online-A        | 52.7    | 0.032  |
|       | online-G           | 45.3    | -0.233 | 10 | 1↓            | online-A         | 39.6    | -0.438 | 10 | —                | online-G        | 50.1    | -0.070 |
|       | 11 HY-SMT-en-fi    | 42.7    | -0.334 | 1↑ | HY-AH-en-fi   | 38.9             | -0.460  |        | —  | HY-SMT-en-fi     | 48.7            | -0.123  |        |
|       | HY-AH-en-fi        | 41.5    | -0.369 | 1↓ | HY-SMT-en-fi  | 37.1             | -0.528  |        | 12 | —                | HY-AH-en-fi     | 44.3    | -0.272 |

Table 7: Results of the English→Finnish language direction with WMT, ORG, and TRS. Systems are ordered by standardized mean DA score. If a system does not contain a rank, it indicates that it shares the same cluster as the system above it. Clusters are obtained according to Wilcoxon rank-sum test at p-level  $p \leq 0.05$ . Indicated in the [↑↓] column are the changes in absolute ranking (i.e. how many positions it goes up or down).

German→English

|       | #  | SYSTEM         | RAW.WMT | Z.WMT  | #  | ↑↓ | SYSTEM         | RAW.ORG | Z.ORG  | #  | ↑↓ | SYSTEM         | RAW.TRS | Z.TRS  |
|-------|----|----------------|---------|--------|----|----|----------------|---------|--------|----|----|----------------|---------|--------|
| wmt16 | 1  | uedin-nmt      | 75.8    | 0.204  | 1  | —  | uedin-nmt      | 71.7    | 0.051  | 1  | —  | uedin-nmt      | 79.9    | 0.357  |
|       | 2  | online-A       | 72.7    | 0.095  | 2  | —  | online-A       | 68.4    | -0.046 | 2  | 1↑ | online-B       | 77.2    | 0.251  |
|       |    | online-B       | 72.2    | 0.086  |    | —  | online-B       | 67.3    | -0.079 |    | 1↑ | uedin-syntax   | 76.4    | 0.240  |
|       |    | uedin-syntax   | 71.5    | 0.065  |    | —  | uedin-syntax   | 66.6    | -0.108 |    | 1↑ | KIT            | 76.6    | 0.237  |
|       |    | KIT            | 71.4    | 0.062  |    | —  | KIT            | 66.2    | -0.112 |    | 3↓ | online-A       | 77.0    | 0.235  |
|       |    | uedin-pbmt     | 70.9    | 0.042  |    | 2↑ | online-G       | 66.1    | -0.120 |    | —  | uedin-pbmt     | 75.6    | 0.204  |
|       |    | jhu-pbmt       | 70.5    | 0.019  |    | 1↓ | uedin-pbmt     | 66.1    | -0.122 |    | —  | jhu-pbmt       | 74.6    | 0.171  |
|       |    | online-G       | 70.2    | 0.009  |    | 1↓ | jhu-pbmt       | 66.3    | -0.133 |    | —  | online-G       | 74.2    | 0.139  |
|       | 9  | online-F       | 64.0    | -0.204 | 9  | —  | online-F       | 61.4    | -0.291 | 9  | —  | online-F       | 66.6    | -0.118 |
|       |    | jhu-syntax     | 62.4    | -0.261 | 10 | —  | jhu-syntax     | 58.4    | -0.395 |    | —  | jhu-syntax     | 66.4    | -0.127 |
| wmt17 | 1  | online-B       | 78.2    | 0.213  | 1  | —  | online-B       | 75.8    | 0.125  | 1  | —  | online-B       | 80.4    | 0.298  |
|       | 2  | online-A       | 76.6    | 0.169  | 2  | 1↑ | KIT            | 73.7    | 0.071  | 2↑ | —  | uedin-nmt      | 80.4    | 0.294  |
|       |    | KIT            | 76.6    | 0.165  |    | 1↓ | online-A       | 74.1    | 0.069  |    | 1↓ | online-A       | 79.1    | 0.269  |
|       |    | uedin-nmt      | 76.6    | 0.162  |    | —  | uedin-nmt      | 72.8    | 0.029  |    | 1↓ | KIT            | 79.6    | 0.262  |
|       |    | RWTH-nmt       | 75.8    | 0.131  |    | —  | RWTH-nmt       | 73.0    | 0.021  |    | —  | RWTH-nmt       | 78.7    | 0.240  |
|       |    | SYSTRAN        | 74.5    | 0.098  |    | —  | SYSTRAN        | 71.0    | -0.021 |    | —  | SYSTRAN        | 78.0    | 0.220  |
|       | 7  | LIUM-NMT       | 72.9    | 0.029  |    | —  | LIUM-NMT       | 70.4    | -0.050 | 7  | —  | LIUM-NMT       | 75.5    | 0.110  |
|       | 8  | TALP-UPC       | 70.2    | -0.058 | 8  | —  | TALP-UPC       | 67.0    | -0.162 | 8  | 1↑ | online-G       | 74.0    | 0.080  |
|       |    | online-G       | 69.8    | -0.072 |    | 1↑ | C-3MA          | 66.3    | -0.210 |    | 1↓ | TALP-UPC       | 73.3    | 0.044  |
|       |    | C-3MA          | 68.6    | -0.103 |    | 1↓ | online-G       | 65.6    | -0.227 |    | —  | C-3MA          | 70.9    | 0.004  |
|       | 11 | online-F       | 64.1    | -0.260 | 11 | —  | online-F       | 62.5    | -0.325 | 11 | —  | online-F       | 65.9    | -0.192 |
| wmt18 | 1  | RWTH           | 79.9    | 0.413  | 1  | —  | RWTH           | 76.1    | 0.281  | 1  | 1↑ | UCAM           | 84.2    | 0.553  |
|       |    | UCAM           | 79.4    | 0.395  | 2  | —  | UCAM           | 74.6    | 0.234  |    | 1↓ | RWTH           | 83.5    | 0.540  |
|       |    | NTT            | 78.2    | 0.359  |    | 1↑ | online-B       | 72.8    | 0.199  |    | —  | NTT            | 83.0    | 0.523  |
|       |    | online-B       | 77.3    | 0.346  |    | 1↓ | NTT            | 73.4    | 0.196  |    | 2↑ | JHU            | 82.7    | 0.504  |
|       |    | MLLP-UPV       | 77.4    | 0.321  |    | 3↑ | online-Y       | 72.8    | 0.181  |    | 1↓ | online-B       | 81.8    | 0.497  |
|       |    | JHU            | 77.0    | 0.317  |    | 1↓ | MLLP-UPV       | 73.4    | 0.179  |    | 4↑ | uedin          | 82.2    | 0.494  |
|       |    | Ubiquis-NMT    | 76.9    | 0.315  |    | —  | Ubiquis-NMT    | 72.4    | 0.172  |    | 2↓ | MLLP-UPV       | 81.6    | 0.471  |
|       |    | online-Y       | 76.7    | 0.310  |    | 1↑ | online-A       | 71.4    | 0.126  |    | 1↓ | Ubiquis-NMT    | 81.5    | 0.458  |
|       | 9  | online-A       | 75.7    | 0.268  |    | 3↓ | JHU            | 71.0    | 0.120  |    | 1↓ | online-Y       | 80.6    | 0.440  |
|       |    | uedin          | 75.4    | 0.261  |    | —  | uedin          | 68.7    | 0.032  |    | 1↓ | online-A       | 80.1    | 0.411  |
|       | 11 | LMU-nmt        | 72.5    | 0.162  | 10 | —  | NJUNMT-private | 68.9    | 0.029  |    | —  | LMU-nmt        | 78.7    | 0.364  |
|       |    | NJUNMT-private | 72.2    | 0.149  | 12 | 1↓ | LMU-nmt        | 66.3    | -0.035 | 12 | —  | NJUNMT-private | 75.6    | 0.270  |
|       | 13 | online-G       | 65.2    | -0.074 | 13 | —  | online-G       | 59.8    | -0.244 | 13 | —  | online-G       | 70.4    | 0.092  |
|       | 14 | online-F       | 58.5    | -0.296 | 14 | —  | online-F       | 56.1    | -0.378 | 14 | —  | online-F       | 60.8    | -0.214 |
|       | 15 | RWTH-UNSUPER   | 45.4    | -0.752 | 15 | —  | RWTH-UNSUPER   | 41.1    | -0.883 | 15 | —  | RWTH-UNSUPER   | 49.6    | -0.624 |
|       | 16 | LMU-unsup      | 42.7    | -0.835 | 16 | —  | LMU-unsup      | 38.7    | -0.972 | 16 | —  | LMU-unsup      | 46.7    | -0.697 |

Table 8: Results of the German→English language direction with WMT, ORG, and TRS. Systems are ordered by standardized mean DA score. If a system does not contain a rank, it indicates that it shares the same cluster as the system above it. Clusters are obtained according to Wilcoxon rank-sum test at p-level  $p \leq 0.05$ . Indicated in the [↑↓] column are the changes in absolute ranking (i.e. how many positions it goes up or down).

| English→German |    |                  |         |        |    |    |                  |         |        |    |    |                  |         |        |
|----------------|----|------------------|---------|--------|----|----|------------------|---------|--------|----|----|------------------|---------|--------|
|                | #  | SYSTEM           | RAW.WMT | Z.WMT  | #  | ↑↓ | SYSTEM           | RAW.ORG | Z.ORG  | #  | ↑↓ | SYSTEM           | RAW.TRS | Z.TRS  |
| wmt17          | 1  | LMU-nmt-reranked | 72.9    | 0.257  | 1  | —  | LMU-nmt-reranked | 68.8    | 0.101  | 1  | —  | LMU-nmt-reranked | 77.3    | 0.423  |
|                | 2  | online-B         | 70.2    | 0.158  | —  | —  | online-B         | 66.9    | 0.052  | 1↑ | ↑  | uedin-nmt        | 75.9    | 0.356  |
|                |    | uedin-nmt        | 69.8    | 0.139  | —  | —  | uedin-nmt        | 65.0    | -0.036 | 1↓ | ↓  | online-B         | 74.4    | 0.294  |
|                |    | SYSTRAN          | 68.9    | 0.092  | —  | —  | SYSTRAN          | 64.4    | -0.059 | 1↑ | ↑  | LMU-nmt-single   | 73.3    | 0.280  |
|                |    | LMU-nmt-single   | 66.9    | 0.035  | 4↑ | ↑  | RWTH-nmt         | 61.9    | -0.149 | 1↓ | ↓  | SYSTRAN          | 73.9    | 0.256  |
|                |    | KIT              | 66.7    | 0.022  | 1↑ | ↑  | xmu              | 62.1    | -0.151 | —  | —  | KIT              | 72.2    | 0.238  |
|                |    | xmu              | 66.4    | 0.015  | 2↓ | ↓  | LMU-nmt-single   | 61.7    | -0.164 | 1↑ | ↑  | LIUM-NMT         | 73.0    | 0.238  |
|                |    | LIUM-NMT         | 66.6    | 0.006  | —  | —  | LIUM-NMT         | 61.7    | -0.172 | 1↓ | ↓  | xmu              | 70.3    | 0.165  |
|                |    | RWTH-nmt         | 66.0    | -0.003 | 3↓ | ↓  | KIT              | 61.7    | -0.174 | —  | —  | RWTH-nmt         | 70.6    | 0.162  |
|                | 10 | online-A         | 60.1    | -0.233 | 10 | 1↑ | PROMT-Rule-based | 55.6    | -0.406 | 10 | —  | online-A         | 65.2    | -0.041 |
|                |    | PROMT-Rule-based | 60.3    | -0.234 | 2↑ | ↑  | fbk-nmt-combi    | 55.5    | -0.406 | —  | —  | PROMT-Rule-based | 64.9    | -0.064 |
|                |    | C-3MA            | 58.9    | -0.270 | 2↓ | ↓  | online-A         | 55.2    | -0.418 | —  | —  | C-3MA            | 63.8    | -0.082 |
|                |    | fbk-nmt-combi    | 58.1    | -0.301 | 1↓ | ↓  | C-3MA            | 54.6    | -0.437 | —  | —  | fbk-nmt-combi    | 61.5    | -0.162 |
|                |    | TALP-UPC         | 55.2    | -0.391 | 14 | 1↑ | online-F         | 51.5    | -0.570 | —  | —  | TALP-UPC         | 60.5    | -0.184 |
|                |    | online-F         | 54.9    | -0.440 | 1↓ | ↓  | TALP-UPC         | 50.3    | -0.585 | —  | —  | online-F         | 58.5    | -0.303 |
|                |    | online-G         | 53.2    | -0.491 | —  | —  | online-G         | 48.8    | -0.660 | —  | —  | online-G         | 57.3    | -0.332 |
| wmt18          | 1  | online-Z         | 85.5    | 0.653  | 1  | —  | online-Z         | 83.6    | 0.587  | 1  | —  | online-Z         | 87.4    | 0.719  |
|                | 2  | online-B         | 82.2    | 0.561  | —  | —  | online-B         | 81.9    | 0.544  | 2  | 3↑ | UCAM             | 84.1    | 0.599  |
|                |    | Microsoft-Marian | 81.9    | 0.551  | —  | —  | Microsoft-Marian | 81.6    | 0.533  | 1↓ | ↓  | online-B         | 82.5    | 0.578  |
|                |    | MMT-production   | 81.6    | 0.539  | —  | —  | MMT-production   | 81.5    | 0.522  | 2↑ | ↑  | NTT              | 82.5    | 0.578  |
|                |    | UCAM             | 82.3    | 0.537  | —  | —  | UCAM             | 80.3    | 0.475  | 2↓ | ↓  | Microsoft-Marian | 82.2    | 0.568  |
|                |    | NTT              | 80.2    | 0.491  | —  | —  | NTT              | 78.1    | 0.409  | 2↓ | ↓  | MMT-production   | 81.7    | 0.556  |
|                |    | KIT              | 79.3    | 0.454  | 1↑ | ↑  | online-Y         | 77.7    | 0.403  | —  | —  | KIT              | 81.1    | 0.525  |
|                | 8  | online-Y         | 77.7    | 0.396  | 1↓ | ↓  | KIT              | 77.5    | 0.383  | 1↑ | ↑  | JHU              | 80.2    | 0.497  |
|                |    | JHU              | 76.7    | 0.377  | 1↑ | ↑  | uedin            | 74.3    | 0.298  | 9  | 1↑ | uedin            | 78.3    | 0.405  |
|                |    | uedin            | 76.3    | 0.352  | 1↓ | ↓  | JHU              | 73.5    | 0.265  | 2↓ | ↓  | online-Y         | 77.7    | 0.389  |
|                | 11 | LMU-nmt          | 71.8    | 0.213  | 11 | —  | LMU-nmt          | 68.7    | 0.103  | —  | —  | LMU-nmt          | 74.6    | 0.317  |
|                | 12 | online-A         | 67.4    | 0.060  | 12 | —  | online-A         | 62.9    | -0.087 | 12 | —  | online-A         | 71.9    | 0.208  |
|                | 13 | online-F         | 53.2    | -0.385 | 13 | —  | online-F         | 50.7    | -0.463 | 13 | —  | online-F         | 55.6    | -0.309 |
|                |    | online-G         | 53.8    | -0.416 | —  | —  | online-G         | 51.3    | -0.505 | —  | —  | online-G         | 56.4    | -0.326 |
|                | 15 | RWTH-UNSUPER     | 36.7    | -0.966 | 15 | —  | RWTH-UNSUPER     | 34.8    | -1.002 | 15 | —  | RWTH-UNSUPER     | 38.7    | -0.930 |
|                | 16 | LMU-unsup        | 32.6    | -1.122 | 16 | —  | LMU-unsup        | 30.0    | -1.193 | 16 | —  | LMU-unsup        | 35.1    | -1.056 |

Table 9: Results of the English→German language direction with WMT, ORG, and TRS. Systems are ordered by standardized mean DA score. If a system does not contain a rank, it indicates that it shares the same cluster as the system above it. Clusters are obtained according to Wilcoxon rank-sum test at p-level  $p \leq 0.05$ . Indicated in the [↑↓] column are the changes in absolute ranking (i.e. how many positions it goes up or down).

Latvian→English

| #     | SYSTEM           | RAW.WMT | Z.WMT  | # | ↑↓ | SYSTEM           | RAW.ORG | Z.ORG  | # | ↑↓ | SYSTEM           | RAW.TRS | Z.TRS  |
|-------|------------------|---------|--------|---|----|------------------|---------|--------|---|----|------------------|---------|--------|
| wmt17 | 1 online-B       | 76.2    | 0.266  | 1 | —  | online-B         | 75.8    | 0.266  | 1 | 1↑ | tilde-nc-nmt-smt | 76.8    | 0.268  |
|       | tilde-nc-nmt-smt | 76.2    | 0.245  |   | —  | tilde-nc-nmt-smt | 75.5    | 0.222  |   | 1↓ | online-B         | 76.5    | 0.267  |
|       | 3 uedin-nmt      | 71.4    | 0.087  | 3 | 1↑ | tilde-c-nmt-smt  | 69.8    | 0.043  | 3 | —  | uedin-nmt        | 74.0    | 0.168  |
|       | tilde-c-nmt-smt  | 71.0    | 0.083  |   | 1↓ | uedin-nmt        | 68.8    | 0.007  | 4 | —  | tilde-c-nmt-smt  | 72.1    | 0.121  |
|       | 5 online-A       | 67.3    | -0.039 | 5 | —  | online-A         | 64.5    | -0.142 |   | —  | online-A         | 70.0    | 0.062  |
|       | 6 jhu-pbmt       | 64.4    | -0.137 |   | —  | jhu-pbmt         | 63.1    | -0.185 | 6 | —  | jhu-pbmt         | 65.8    | -0.089 |
|       | 7 C-3MA          | 63.4    | -0.187 |   | —  | C-3MA            | 62.5    | -0.223 |   | 1↑ | Hunter-MT        | 63.9    | -0.134 |
|       | Hunter-MT        | 62.2    | -0.199 |   | —  | Hunter-MT        | 60.3    | -0.264 |   | 1↓ | C-3MA            | 64.2    | -0.153 |
|       | 9 PJATK          | 56.3    | -0.436 | 9 | —  | PJATK            | 53.5    | -0.554 | 9 | —  | PJATK            | 59.1    | -0.316 |

Table 10: Results of the Latvian→English language direction with WMT, ORG, and TRS. Systems are ordered by standardized mean DA score. If a system does not contain a rank, it indicates that it shares the same cluster as the system above it. Clusters are obtained according to Wilcoxon rank-sum test at p-level  $p \leq 0.05$ . Indicated in the [↑↓] column are the changes in absolute ranking (i.e. how many positions it goes up or down).

English→Latvian

| #     | SYSTEM              | RAW.WMT | Z.WMT  | #  | ↑↓ | SYSTEM              | RAW.ORG | Z.ORG  | #  | ↑↓ | SYSTEM              | RAW.TRS | Z.TRS  |
|-------|---------------------|---------|--------|----|----|---------------------|---------|--------|----|----|---------------------|---------|--------|
| wmt17 | 1 tilde-nc-nmt-smt  | 54.4    | 0.196  | 1  | —  | tilde-nc-nmt-smt    | 43.2    | -0.168 | 1  | —  | tilde-nc-nmt-smt    | 66.1    | 0.579  |
|       | online-B            | 51.6    | 0.121  |    | —  | online-B            | 40.6    | -0.222 |    | 1↑ | tilde-c-nmt-smt     | 64.9    | 0.519  |
|       | tilde-c-nmt-smt     | 51.1    | 0.104  |    | 1↑ | limsi-factored-norm | 41.3    | -0.235 |    | 1↓ | online-B            | 63.1    | 0.484  |
|       | limsi-factored-norm | 50.8    | 0.075  |    | 3↑ | usfd-consensus-kit  | 40.4    | -0.244 |    | 1↑ | usfd-consensus-qt21 | 61.0    | 0.413  |
|       | usfd-consensus-qt21 | 50.0    | 0.058  |    | 2↓ | tilde-c-nmt-smt     | 39.2    | -0.255 |    | 1↓ | limsi-factored-norm | 61.0    | 0.410  |
|       | QT21-System-Combi   | 47.1    | -0.014 |    | 1↓ | usfd-consensus-qt21 | 40.0    | -0.264 |    | —  | QT21-System-Combi   | 58.8    | 0.346  |
|       | usfd-consensus-kit  | 47.3    | -0.027 |    | 2↑ | uedin-nmt           | 39.1    | -0.271 |    | —  | usfd-consensus-kit  | 54.7    | 0.205  |
|       | KIT                 | 45.7    | -0.063 |    | —  | KIT                 | 37.1    | -0.321 |    | —  | KIT                 | 54.5    | 0.200  |
|       | uedin-nmt           | 45.2    | -0.072 |    | 3↓ | QT21-System-Combi   | 36.8    | -0.334 |    | 1↑ | tilde-nc-smt        | 55.1    | 0.183  |
|       | tilde-nc-smt        | 44.9    | -0.099 |    | —  | tilde-nc-smt        | 34.5    | -0.387 |    | 1↓ | uedin-nmt           | 52.6    | 0.168  |
|       | LIUM-FNMT           | 43.2    | -0.157 |    | 1↑ | LIUM-NMT            | 35.7    | -0.461 |    | —  | LIUM-FNMT           | 51.7    | 0.125  |
|       | LIUM-NMT            | 43.0    | -0.198 |    | 1↓ | LIUM-FNMT           | 34.0    | -0.464 |    | —  | LIUM-NMT            | 50.0    | 0.055  |
|       | HY-HNMT             | 40.1    | -0.253 |    | —  | HY-HNMT             | 30.2    | -0.572 |    | —  | HY-HNMT             | 47.8    | -0.005 |
|       | online-A            | 37.5    | -0.341 |    | —  | online-A            | 30.0    | -0.573 |    | 1↑ | jhu-pbmt            | 44.5    | -0.099 |
|       | jhu-pbmt            | 36.1    | -0.368 |    | —  | jhu-pbmt            | 28.2    | -0.618 |    | 1↓ | online-A            | 44.5    | -0.124 |
|       | C-3MA               | 33.3    | -0.457 |    | —  | C-3MA               | 24.6    | -0.735 |    | —  | C-3MA               | 41.3    | -0.201 |
|       | 17 PJATK            | 18.8    | -0.947 | 17 | —  | PJATK               | 13.9    | -1.138 | 17 | —  | PJATK               | 23.8    | -0.752 |

Table 11: Results of the English→Latvian language direction with WMT, ORG, and TRS. Systems are ordered by standardized mean DA score. If a system does not contain a rank, it indicates that it shares the same cluster as the system above it. Clusters are obtained according to Wilcoxon rank-sum test at p-level  $p \leq 0.05$ . Indicated in the [↑↓] column are the changes in absolute ranking (i.e. how many positions it goes up or down).



| Romanian→English |   |              |         |        |   |    |              |         |        |   |                |              |         |        |
|------------------|---|--------------|---------|--------|---|----|--------------|---------|--------|---|----------------|--------------|---------|--------|
|                  | # | SYSTEM       | RAW.WMT | Z.WMT  | # | ↑↓ | SYSTEM       | RAW.ORG | Z.ORG  | # | ↑↓             | SYSTEM       | RAW.TRS | Z.TRS  |
| wmt16            | 1 | online-B     | 73.9    | 0.129  | 1 | —  | online-B     | 73.5    | 0.117  | 1 | —              | online-B     | 74.4    | 0.140  |
|                  | 2 | uedin-nmt    | 71.2    | 0.044  | 2 | —  | uedin-nmt    | 70.9    | 0.037  | 2 | 1 <sup>↑</sup> | uedin-pbmt   | 72.1    | 0.063  |
|                  |   | uedin-pbmt   | 71.0    | 0.025  |   | —  | uedin-pbmt   | 69.9    | -0.013 |   | 2 <sup>↑</sup> | online-A     | 72.2    | 0.058  |
|                  |   | uedin-syntax | 69.9    | -0.000 |   | —  | uedin-syntax | 68.6    | -0.031 |   | 2 <sup>↓</sup> | uedin-nmt    | 71.4    | 0.052  |
|                  |   | online-A     | 69.7    | -0.012 |   | —  | online-A     | 67.2    | -0.082 |   | 1 <sup>↓</sup> | uedin-syntax | 71.2    | 0.030  |
|                  | 6 | LIMSI        | 66.7    | -0.123 | 6 | —  | LIMSI        | 63.1    | -0.257 |   | —              | LIMSI        | 70.3    | 0.012  |
|                  |   | jhu-pbmt     | 65.7    | -0.160 |   | —  | jhu-pbmt     | 60.6    | -0.306 |   | —              | jhu-pbmt     | 70.8    | -0.012 |
|                  |   |              |         |        |   |    |              |         |        |   |                |              |         |        |

Table 12: Results of the Romanian→English language direction with WMT, ORG, and TRS. Systems are ordered by standardized mean DA score. If a system does not contain a rank, it indicates that it shares the same cluster as the system above it. Clusters are obtained according to Wilcoxon rank-sum test at p-level  $p \leq 0.05$ . Indicated in the [↑↓] column are the changes in absolute ranking (i.e. how many positions it goes up or down).

| Russian→English |                     |         |        |    |                |                     |         |        |    |                |                     |         |        |
|-----------------|---------------------|---------|--------|----|----------------|---------------------|---------|--------|----|----------------|---------------------|---------|--------|
| #               | SYSTEM              | RAW.WMT | Z.WMT  | #  | ↑↓             | SYSTEM              | RAW.ORG | Z.ORG  | #  | ↑↓             | SYSTEM              | RAW.TRS | Z.TRS  |
| wmt16           | 1 online-G          | 74.2    | 0.115  | 1  | 4 <sup>↑</sup> | PROMT-Rule-based    | 73.0    | 0.072  | 1  | —              | online-G            | 76.0    | 0.172  |
|                 | AMU-UEDIN           | 73.3    | 0.103  |    | 1 <sup>↓</sup> | online-G            | 72.5    | 0.058  |    | —              | AMU-UEDIN           | 74.6    | 0.155  |
|                 | online-B            | 72.8    | 0.083  |    | 1 <sup>↓</sup> | AMU-UEDIN           | 72.0    | 0.051  |    | —              | online-B            | 74.8    | 0.142  |
|                 | NRC                 | 72.7    | 0.060  |    | 1 <sup>↓</sup> | online-B            | 70.8    | 0.025  |    | —              | NRC                 | 75.0    | 0.140  |
|                 | 5 PROMT-Rule-based  | 72.1    | 0.044  |    | 1 <sup>↓</sup> | NRC                 | 70.3    | -0.020 | 5  | 1 <sup>↑</sup> | uedin-nmt           | 72.3    | 0.061  |
|                 | uedin-nmt           | 71.1    | 0.011  |    | —              | uedin-nmt           | 70.0    | -0.039 |    | 1 <sup>↑</sup> | online-A            | 72.7    | 0.055  |
|                 | online-A            | 70.8    | -0.007 |    | —              | online-A            | 68.9    | -0.069 |    | 1 <sup>↑</sup> | AFRL-MITLL-Phrase   | 72.2    | 0.030  |
|                 | AFRL-MITLL-Phrase   | 70.1    | -0.040 |    | —              | AFRL-MITLL-Phrase   | 67.9    | -0.111 | 8  | 3 <sup>↓</sup> | PROMT-Rule-based    | 71.3    | 0.016  |
|                 | AFRL-MITLL-contrast | 69.3    | -0.071 |    | —              | AFRL-MITLL-contrast | 68.2    | -0.125 |    | —              | AFRL-MITLL-contrast | 70.5    | -0.018 |
|                 | 10 online-F         | 61.8    | -0.322 | 10 | —              | online-F            | 62.0    | -0.295 | 10 | —              | online-F            | 61.6    | -0.349 |
| wmt17           | 1 online-B          | 82.0    | 0.271  | 1  | —              | online-B            | 81.3    | 0.255  | 1  | —              | online-B            | 82.6    | 0.288  |
|                 | 2 online-G          | 77.6    | 0.126  | 2  | —              | online-G            | 76.0    | 0.052  | 2  | —              | online-G            | 79.1    | 0.196  |
|                 | 3 NRC               | 76.5    | 0.081  |    | —              | NRC                 | 74.4    | -0.001 |    | —              | NRC                 | 78.7    | 0.161  |
|                 | online-A            | 76.1    | 0.057  |    | —              | online-A            | 74.3    | -0.004 |    | —              | online-A            | 78.0    | 0.118  |
|                 | afri-mitll-syscomb  | 74.9    | 0.017  |    | 1 <sup>↑</sup> | afri-mitll-opennmt  | 73.8    | -0.007 |    | —              | afri-mitll-syscomb  | 76.8    | 0.087  |
|                 | afri-mitll-opennmt  | 74.6    | 0.005  |    | 1 <sup>↓</sup> | afri-mitll-syscomb  | 73.1    | -0.053 | 6  | 2 <sup>↑</sup> | jhu-pbmt            | 77.1    | 0.071  |
|                 | uedin-nmt           | 74.2    | 0.002  |    | —              | uedin-nmt           | 72.3    | -0.062 |    | —              | uedin-nmt           | 76.1    | 0.062  |
|                 | jhu-pbmt            | 74.7    | -0.011 |    | —              | jhu-pbmt            | 72.4    | -0.091 |    | 1 <sup>↓</sup> | afri-mitll-opennmt  | 75.3    | 0.017  |
|                 | 9 online-F          | 65.9    | -0.288 | 9  | —              | online-F            | 65.8    | -0.290 | 9  | —              | online-F            | 66.0    | -0.287 |
|                 |                     |         |        |    |                |                     |         |        |    |                |                     |         |        |
| wmt18           | 1 Alibaba           | 81.0    | 0.215  | 1  | —              | Alibaba             | 80.9    | 0.197  | 1  | —              | Alibaba             | 81.0    | 0.232  |
|                 | online-B            | 80.3    | 0.192  |    | —              | online-B            | 80.2    | 0.185  |    | —              | online-B            | 80.3    | 0.199  |
|                 | online-G            | 79.6    | 0.170  |    | —              | online-G            | 78.8    | 0.143  |    | —              | online-G            | 80.3    | 0.197  |
|                 | 4 uedin             | 77.5    | 0.110  |    | —              | uedin               | 76.6    | 0.080  | 4  | —              | uedin               | 78.3    | 0.141  |
|                 | 5 online-A          | 76.2    | 0.034  |    | —              | online-A            | 75.7    | 0.010  | 5  | —              | online-A            | 76.6    | 0.058  |
|                 | 6 afri-ruen-syscomb | 74.1    | -0.014 |    | 1 <sup>↑</sup> | JHU                 | 73.6    | -0.026 |    | —              | afri-ruen-syscomb   | 74.4    | 0.003  |
|                 | JHU                 | 73.7    | -0.027 |    | 1 <sup>↓</sup> | afri-ruen-syscomb   | 73.7    | -0.032 |    | —              | JHU                 | 73.8    | -0.029 |
|                 | 8 online-F          | 64.2    | -0.398 | 8  | —              | online-F            | 66.0    | -0.322 | 8  | —              | online-F            | 62.5    | -0.475 |

Table 13: Results of the Russian→English language direction with WMT, ORG, and TRS. Systems are ordered by standardized mean DA score. If a system does not contain a rank, it indicates that it shares the same cluster as the system above it. Clusters are obtained according to Wilcoxon rank-sum test at p-level  $p \leq 0.05$ . Indicated in the [↑↓] column are the changes in absolute ranking (i.e. how many positions it goes up or down).

| English→Russian |   |                      |         |        |   |    |                      |         |        |   |    |                      |         |        |
|-----------------|---|----------------------|---------|--------|---|----|----------------------|---------|--------|---|----|----------------------|---------|--------|
|                 | # | SYSTEM               | RAW.WMT | Z.WMT  | # | ↑↓ | SYSTEM               | RAW.ORG | Z.ORG  | # | ↑↓ | SYSTEM               | RAW.TRS | Z.TRS  |
| wmt17           | 1 | online-B             | 75.4    | 0.402  | 1 | —  | online-B             | 69.6    | 0.202  | 1 | —  | online-B             | 81.2    | 0.601  |
|                 | 2 | uedin-nmt            | 68.2    | 0.166  | 2 | —  | uedin-nmt            | 60.4    | -0.091 | 2 | —  | uedin-nmt            | 76.0    | 0.424  |
|                 | 3 | online-H             | 66.5    | 0.105  |   | 1↑ | PROMT-Rule-based     | 60.4    | -0.105 |   | —  | online-H             | 74.5    | 0.384  |
|                 | 4 | PROMT-Rule-based     | 65.9    | 0.080  |   | 1↑ | online-A             | 59.2    | -0.137 | 4 | 2↑ | online-G             | 73.6    | 0.326  |
|                 |   | online-A             | 65.2    | 0.061  |   | 2↓ | online-H             | 58.9    | -0.159 | 5 | 1↓ | PROMT-Rule-based     | 71.6    | 0.273  |
|                 |   | online-G             | 65.2    | 0.054  | 6 | —  | online-G             | 56.9    | -0.214 |   | 1↓ | online-A             | 71.1    | 0.255  |
|                 | 7 | jhu-pbmt             | 62.6    | -0.018 |   | —  | jhu-pbmt             | 54.6    | -0.273 |   | —  | jhu-pbmt             | 70.6    | 0.240  |
|                 | 8 | afri-mitll-backtrans | 57.3    | -0.194 | 7 | —  | afri-mitll-backtrans | 50.7    | -0.418 | 8 | —  | afri-mitll-backtrans | 63.9    | 0.032  |
|                 | 9 | online-F             | 46.5    | -0.568 | 8 | —  | online-F             | 41.5    | -0.740 | 9 | —  | online-F             | 51.4    | -0.405 |
| wmt18           | 1 | Alibaba-ensemble     | 72.0    | 0.352  | 1 | —  | Alibaba-ensemble     | 64.6    | 0.113  | 1 | —  | Alibaba-ensemble     | 79.4    | 0.592  |
|                 |   | online-G             | 71.4    | 0.324  |   | —  | online-G             | 64.3    | 0.075  |   | —  | online-G             | 78.5    | 0.570  |
|                 | 3 | online-B             | 66.8    | 0.159  | 3 | —  | online-B             | 60.1    | -0.049 | 3 | 1↑ | uedin                | 73.2    | 0.389  |
|                 |   | uedin                | 66.0    | 0.144  |   | —  | uedin                | 58.8    | -0.101 |   | 1↓ | online-B             | 73.4    | 0.365  |
|                 |   | PROMT-Marian         | 64.9    | 0.115  |   | —  | PROMT-Marian         | 58.0    | -0.114 |   | —  | PROMT-Marian         | 72.1    | 0.355  |
|                 | 6 | PROMT-OpenNMT        | 63.9    | 0.066  |   | —  | PROMT-OpenNMT        | 56.5    | -0.155 |   | 1↑ | online-A             | 70.8    | 0.292  |
|                 | 7 | online-A             | 62.2    | -0.004 | 7 | 1↑ | PROMT-Rule-based     | 53.7    | -0.242 |   | 1↓ | PROMT-OpenNMT        | 71.0    | 0.279  |
|                 | 8 | PROMT-Rule-based     | 59.1    | -0.075 |   | 1↓ | online-A             | 53.8    | -0.292 | 8 | —  | PROMT-Rule-based     | 64.8    | 0.097  |
|                 | 9 | online-F             | 44.5    | -0.580 | 9 | —  | online-F             | 42.5    | -0.656 | 9 | —  | online-F             | 46.5    | -0.502 |

Table 14: Results of the English→Russian language direction with WMT, ORG, and TRS. Systems are ordered by standardized mean DA score. If a system does not contain a rank, it indicates that it shares the same cluster as the system above it. Clusters are obtained according to Wilcoxon rank-sum test at p-level  $p \leq 0.05$ . Indicated in the [↑↓] column are the changes in absolute ranking (i.e. how many positions it goes up or down).

| Turkish→English |       |                    |         |        |   |       |                    |         |        |   |       |                    |         |        |
|-----------------|-------|--------------------|---------|--------|---|-------|--------------------|---------|--------|---|-------|--------------------|---------|--------|
|                 | #     | SYSTEM             | RAW.WMT | Z.WMT  | # | ↑↓    | SYSTEM             | RAW.ORG | Z.ORG  | # | ↑↓    | SYSTEM             | RAW.TRS | Z.TRS  |
| wmt16           | 1     | online-B           | 57.1    | 0.163  | 1 | —     | online-B           | 55.5    | 0.120  | 1 | —     | online-B           | 58.7    | 0.205  |
|                 | 2     | online-G           | 55.0    | 0.109  | 2 | —     | online-G           | 53.4    | 0.057  |   | —     | online-G           | 56.4    | 0.157  |
|                 | 3     | online-A           | 52.2    | 0.002  |   | —     | online-A           | 51.5    | -0.009 | 3 | —     | online-A           | 52.9    | 0.012  |
|                 | 4     | tbtk-syscomb       | 49.6    | -0.077 | 4 | 2↑    | dvorkanton         | 48.8    | -0.120 |   | 1↑    | PROMT-SMT          | 51.5    | -0.015 |
|                 |       | PROMT-SMT          | 49.2    | -0.079 |   | 1↓    | tbtk-syscomb       | 48.8    | -0.140 |   | 1↓    | tbtk-syscomb       | 50.3    | -0.017 |
|                 |       | dvorkanton         | 49.5    | -0.088 |   | 1↓    | PROMT-SMT          | 46.9    | -0.144 |   | —     | dvorkanton         | 50.2    | -0.057 |
|                 | 7     | jhu-pbmt           | 41.0    | -0.355 | 7 | —     | jhu-pbmt           | 40.4    | -0.381 | 7 | 1↑    | jhu-syntax         | 41.9    | -0.303 |
|                 |       | jhu-syntax         | 40.8    | -0.364 |   | 1↑    | ParFDA             | 39.7    | -0.390 |   | 1↓    | jhu-pbmt           | 41.5    | -0.329 |
|                 |       | ParFDA             | 40.5    | -0.367 |   | 1↓    | jhu-syntax         | 39.8    | -0.422 |   | —     | ParFDA             | 41.2    | -0.345 |
| wmt17           | 1     | online-B           | 68.8    | 0.294  | 1 | —     | online-B           | 65.0    | 0.171  | 1 | —     | online-B           | 72.7    | 0.417  |
|                 |       | online-A           | 68.5    | 0.282  |   | —     | online-A           | 64.5    | 0.153  |   | —     | online-A           | 72.5    | 0.407  |
|                 | 3     | uedin-nmt          | 61.1    | 0.050  | 3 | —     | uedin-nmt          | 57.8    | -0.051 | 3 | —     | uedin-nmt          | 64.3    | 0.148  |
|                 | 4     | online-G           | 58.6    | -0.029 |   | —     | online-G           | 57.1    | -0.094 | 4 | 1↑    | afri-mitll-m2w-nr1 | 61.4    | 0.057  |
|                 |       | afri-mitll-m2w-nr1 | 58.0    | -0.083 | 5 | 2↑    | LIUM-NMT           | 54.6    | -0.168 |   | 1↑    | afri-mitll-syscomb | 60.3    | 0.040  |
|                 |       | afri-mitll-syscomb | 57.0    | -0.093 |   | 1↓    | afri-mitll-m2w-nr1 | 54.6    | -0.220 |   | 2↓    | online-G           | 60.1    | 0.036  |
|                 |       | LIUM-NMT           | 56.7    | -0.097 |   | 1↓    | afri-mitll-syscomb | 53.7    | -0.224 |   | —     | LIUM-NMT           | 58.8    | -0.028 |
|                 | 8     | PROMT-SMT          | 53.5    | -0.183 | 8 | —     | PROMT-SMT          | 52.6    | -0.227 | 8 | —     | PROMT-SMT          | 54.5    | -0.139 |
|                 | 9     | jhu-pbmt           | 46.4    | -0.436 | 9 | —     | jhu-pbmt           | 44.9    | -0.463 | 9 | —     | jhu-pbmt           | 48.0    | -0.408 |
|                 | JAIST | 45.5               | -0.475  |        | — | JAIST | 45.1               | -0.494  | 10     | — | JAIST | 46.0               | -0.456  |        |
| wmt18           | 1     | online-G           | 74.3    | 0.045  | 1 | —     | online-G           | 71.1    | -0.084 | 1 | 1↑    | online-A           | 78.2    | 0.192  |
|                 |       | online-A           | 74.3    | 0.040  |   | 1↑    | online-B           | 70.6    | -0.112 |   | 1↓    | online-G           | 77.4    | 0.174  |
|                 |       | online-B           | 73.0    | -0.004 |   | 1↓    | online-A           | 70.2    | -0.115 | 3 | —     | online-B           | 75.3    | 0.100  |
|                 |       | uedin              | 71.7    | -0.053 |   | —     | uedin              | 69.0    | -0.175 |   | 1↑    | NICT               | 74.5    | 0.081  |
|                 |       | NICT               | 71.6    | -0.055 |   | —     | NICT               | 68.7    | -0.192 |   | 1↓    | uedin              | 74.4    | 0.067  |

Table 15: Results of the Turkish→English language direction with WMT, ORG, and TRS. Systems are ordered by standardized mean DA score. If a system does not contain a rank, it indicates that it shares the same cluster as the system above it. Clusters are obtained according to Wilcoxon rank-sum test at p-level  $p \leq 0.05$ . Indicated in the [↑↓] column are the changes in absolute ranking (i.e. how many positions it goes up or down).

| English→Turkish |       |                    |         |        |    |          |                    |         |        |    |       |                    |         |        |
|-----------------|-------|--------------------|---------|--------|----|----------|--------------------|---------|--------|----|-------|--------------------|---------|--------|
|                 | #     | SYSTEM             | RAW.WMT | Z.WMT  | #  | ↑↓       | SYSTEM             | RAW.ORG | Z.ORG  | #  | ↑↓    | SYSTEM             | RAW.TRS | Z.TRS  |
| wmt17           | 1     | online-B           | 53.4    | 0.513  | 1  | —        | online-B           | 40.0    | 0.131  | 1  | —     | online-B           | 65.2    | 0.848  |
|                 | 2     | uedin-nmt          | 44.0    | 0.206  | 2  | —        | uedin-nmt          | 32.5    | -0.134 | 2  | —     | uedin-nmt          | 56.5    | 0.576  |
|                 | 3     | online-A           | 39.1    | 0.071  | —  | —        | online-A           | 28.6    | -0.241 | —  | —     | online-A           | 50.3    | 0.406  |
|                 | —     | online-G           | 35.5    | -0.032 | —  | —        | online-G           | 27.5    | -0.285 | 4  | —     | online-G           | 42.9    | 0.200  |
|                 | 5     | LIUM-NMT           | 32.2    | -0.129 | —  | —        | LIUM-NMT           | 23.6    | -0.376 | —  | —     | LIUM-NMT           | 41.3    | 0.132  |
|                 | 6     | jhu-nmt-lattice    | 18.0    | -0.554 | 6  | —        | jhu-nmt-lattice    | 14.3    | -0.654 | 6  | —     | jhu-nmt-lattice    | 21.2    | -0.469 |
|                 | —     | jhu-pbmt           | 16.7    | -0.597 | 1↑ | —        | JAIST              | 12.4    | -0.690 | —  | —     | jhu-pbmt           | 20.5    | -0.484 |
| —               | JAIST | 15.7               | -0.602  | 1↓     | —  | jhu-pbmt | 12.6               | -0.717  | —      | —  | JAIST | 19.3               | -0.504  |        |
| wmt18           | 1     | online-B           | 66.3    | 0.277  | 1  | 1↑       | uedin              | 62.2    | 0.149  | 1  | —     | online-B           | 71.8    | 0.444  |
|                 | —     | uedin              | 63.6    | 0.222  | 1↓ | —        | online-B           | 61.1    | 0.117  | 1↑ | —     | alibaba-ensemble-A | 67.9    | 0.348  |
|                 | —     | alibaba-ensemble-A | 63.5    | 0.216  | —  | —        | alibaba-ensemble-A | 59.6    | 0.097  | 1↓ | —     | uedin              | 65.2    | 0.304  |
|                 | —     | NICT               | 62.0    | 0.128  | —  | —        | NICT               | 59.5    | 0.037  | 1↑ | —     | alibaba-ensemble-B | 65.3    | 0.270  |
|                 | —     | alibaba-ensemble-B | 60.1    | 0.111  | —  | —        | alibaba-ensemble-B | 55.5    | -0.030 | 1↑ | —     | online-G           | 65.5    | 0.264  |
|                 | —     | online-G           | 60.1    | 0.058  | —  | —        | online-G           | 54.7    | -0.145 | 2↓ | —     | NICT               | 64.8    | 0.229  |
|                 | 7     | RWTH               | 55.0    | -0.060 | —  | —        | RWTH               | 52.9    | -0.150 | 7  | —     | RWTH               | 57.1    | 0.029  |
|                 | 8     | online-A           | 49.6    | -0.254 | 8  | —        | online-A           | 47.4    | -0.331 | 8  | —     | online-A           | 51.9    | -0.169 |

Table 16: Results of the English→Turkish language direction with WMT, ORG, and TRS. Systems are ordered by standardized mean DA score. If a system does not contain a rank, it indicates that it shares the same cluster as the system above it. Clusters are obtained according to Wilcoxon rank-sum test at p-level  $p \leq 0.05$ . Indicated in the [↑↓] column are the changes in absolute ranking (i.e. how many positions it goes up or down).
